# Supplementary material for: MOF-on-MOF heterostructures with core–shell and core–satellite structures via controllable nucleation of guest MOFs
Source: Royal Society of Chemistry journal article supplement (doi:10.1039/d2ce01272c), 2022-11-25
Supplement: d2ce01272c1.pdf [file d2ce01272c1.pdf]

## **MOF-on-MOF heterostructures with core-shell and core-satellite structures via controllable nucleation of guest MOF**

*Shumin Li,<sup>a</sup> Liang Zhao,<sup>\*a</sup> Yining Yao,<sup>a</sup> Zhengying Gu,<sup>a</sup> Chao Liu,<sup>a</sup> Wenli Hu,<sup>a</sup> Ye Zhang,<sup>a</sup> Qian Zhao<sup>a</sup> and Chengzhong Yu<sup>\*ab</sup>*

<sup>a</sup>School of Chemistry and Molecular Engineering, East China Normal University, Shanghai 200241, P. R. China. E-mail: lzhao@chem.ecnu.edu.cn; czyu@chem.ecnu.edu.cn

<sup>b</sup>Australian Institute for Bioengineering and Nanotechnology, The University of Queensland, Brisbane, Queensland 4072, Australia. E-mail: c.yu@uq.edu.au

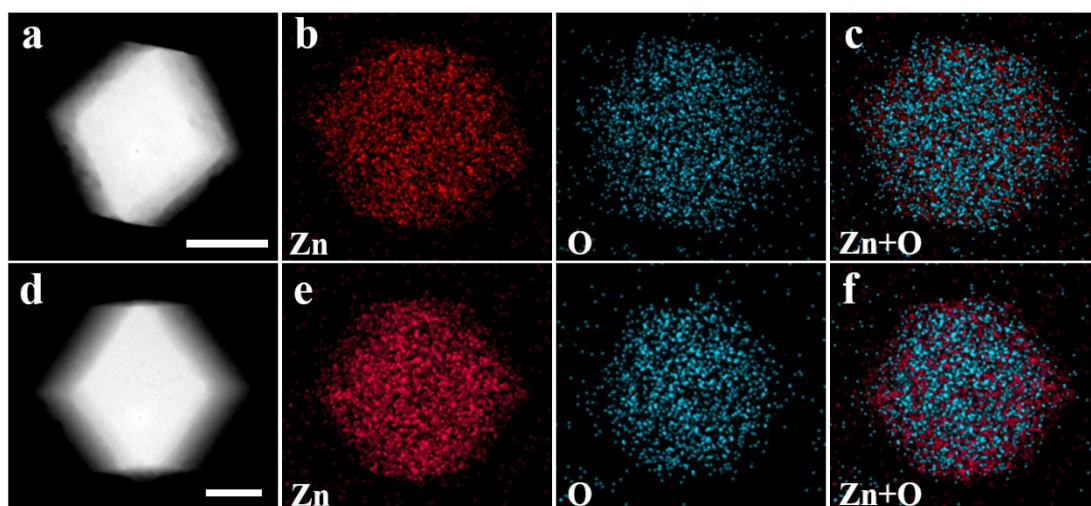

**Fig. S1** (a) STEM image, and (b and c) elemental mapping images of ZIF-90; (d) STEM image, and (e and f) elemental mapping images of ZIF-90@ZIF-8-A. The scale bars are 100 nm.

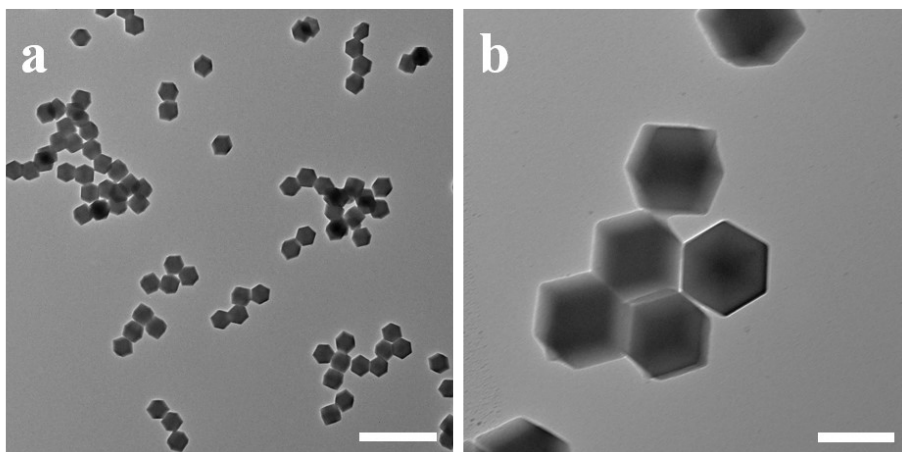

**Fig. S2** (a and b) TEM images of ZIF-8. Scale bars are 1  $\mu\text{m}$  (a) and 200 nm (b).

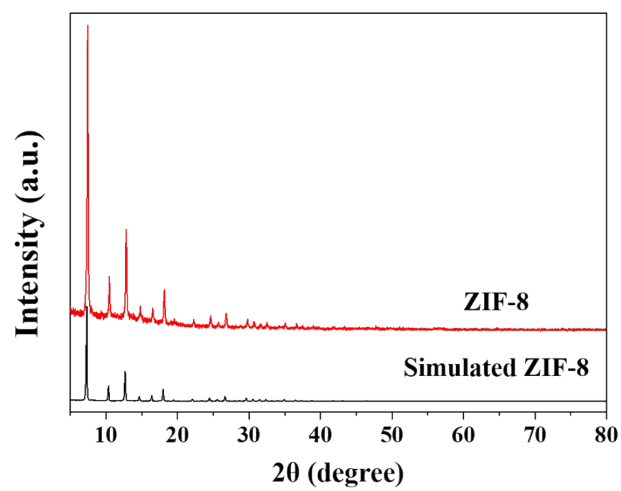

**Fig. S3** XRD patterns of ZIF-8.
